# Supplementary material for: Stakeholder Insights into Czech Performance-Based Managed Entry Agreements: Potential for Transformative Change in Pharmaceutical Access?
Source: MDPI journal article supplement (doi:10.3390/healthcare12010119), 2024-01-04
Supplement: s1 [file s1]

## Supplementary S1: Interview Scenario

- 1) **Introductory Query:** Would you be willing to grant permission for the recording of this interview session?
- 2) **Inquiry Regarding Occupation/Position**
- 3) **Could you kindly specify your professional designation and delineate your responsibilities within the field?**
  - Stakeholders' Relationship with PB-MEA
  - What is the organizational role assumed by the entity you represent in the context of PB-MEA?
  - How do you personally engage with or relate to PB-MEA?
  - From your perspective, which entities or individuals are influenced by PB-MEA?
  - In your estimation, what are the merits and demerits for the involved stakeholders? Who do you believe stands to gain from PB-MEA, and who might encounter challenges?
  - Do you possess practical experience in PB-MEA agreements, or are you familiar with such instances within your milieu?
  - Do you detect any prevailing general dispositions among stakeholders towards PB-MEA, such as scepticism or enthusiasm?
- 4) **Legislation**
  - How do you perceive the extant legislative framework, particularly in light of the recent legislative amendment in 2022, pertaining to PB-MEA?
  - Are there discernible lacunae within the current legal framework?
  - Does there exist an impartial framework applicable to all stakeholders within the current legislative ambit?
  - Does the prevailing legislation adequately mirror societal exigencies, and is it judiciously configured?
  - In your estimation, what are the constructive and adverse facets of the current PB-MEA legal framework?
- 5) **Threats and Opportunities Associated with PB-MEA Implementation**
  - What opportunities do you discern within the PB-MEA domain for the stakeholders involved?
  - What threats linked to PB-MEA do you deem pertinent for the stakeholders?
  - Future Perspectives
  - What recommendations would you posit to facilitate a more efficacious PB-MEA implementation, based on your insights?
  - Which impediments necessitate resolution, and what are your foremost perceptions of the principal challenges?
- 6) **Outcomes**
  - How ought outcomes to be conceptually delineated, and what criteria should underpin their formulation?
  - What categories of outcomes should be deemed germane?
  - Do you evince a predilection for qualitative or quantitative parameters?
  - In what manner should outcomes be vigilantly tracked and supervised?
